# Supplementary material
Source: PubMed Central journal article supplement (PMC3268867)
Supplement: NIHMS324391-supplement-supplement_1.pdf [file NIHMS324391-supplement-supplement_1.pdf]

**ONLINE REPOSITORY**

Erik Wambre, PhD<sup>a</sup>, Jonathan H. DeLong, BSc<sup>a</sup>, Eddie A. James, PhD<sup>a</sup>, Rebecca E. LaFond, PhD<sup>a</sup>, David Robinson, PhD<sup>b</sup>, William W. Kwok, PhD<sup>a,c</sup>

<sup>a</sup>Benaroya Research Institute at Virginia Mason, Seattle, WA 98101

<sup>b</sup>Virginia Mason Medical Center, Seattle, WA 98101

<sup>c</sup>Department of Immunology, University of Washington, Seattle, WA 98195

**Corresponding author:** William W. Kwok, PhD

**Address:** Benaroya Research Institute at Virginia Mason  
1201 Ninth Avenue  
Seattle, WA 98101

**Telephone:** 206-287-5605

**Fax:** 206-342-6581

**E-mail:** [bkwok@benaroyaresearch.org](mailto:bkwok@benaroyaresearch.org)

**Table EI. Study subject characteristics**

| Group        | ID     | Age (y) | HLA-DR typing | Alder IgE Immunocap | Prick test | Basophil test | Asthma |
|--------------|--------|---------|---------------|---------------------|------------|---------------|--------|
| Allergic     | AP-1   | 49      | DR15          | 4                   | 4+         | positive      | Yes    |
|              | AP-2   | 41      | DR15          | 4                   | 4+++       | positive      | No     |
|              | AP-3   | 26      | DR15          | 4                   | 4+         | positive      | Yes    |
|              | AP-4   | 37      | DR15          | 6                   | 4+         | positive      | Yes    |
|              | AP-5   | 33      | DR15          | 5                   | 4+         | positive      | No     |
|              | AP-6   | 22      | DR7           | 5                   | 4+         | positive      | No     |
|              | AP-7   | 39      | DR7           | 3                   | 4++        | positive      | No     |
|              | AP-8   | 29      | DR15          | 3                   | 4+         | positive      | Yes    |
|              | AP-9   | 28      | DR7           | 4                   | 4++        | positive      | Yes    |
|              | AP-10  | 30      | DR15          | 4                   | 4+         | positive      | No     |
|              | AP-11  | 26      | DR15          | 5                   | 4+         | positive      | Yes    |
|              | AP-12  | 34      | DR15          | 4                   | 4+         | positive      | Yes    |
| Non-allergic | NA-1   | 24      | DR15          | 0                   | ND         | negative      | No     |
|              | NA-2   | 26      | DR15          | 0                   | ND         | negative      | No     |
|              | NA-3   | 28      | DR15          | 0                   | ND         | negative      | No     |
|              | NA-4   | 27      | DR7           | 0                   | ND         | negative      | No     |
|              | NA-5   | 27      | DR7           | 0                   | ND         | negative      | No     |
|              | NA-6   | 30      | DR15          | 0                   | ND         | negative      | No     |
| After SIT    | aSIT-1 | 52      | DR15          | 0                   | 0          | negative      | No     |
|              | aSIT-2 | 35      | DR15          | 0                   | 1          | negative      | No     |
|              | aSIT-3 | 57      | DR7           | 0                   | 1          | negative      | Yes    |
|              | aSIT-4 | 44      | DR15          | 0                   | ND         | negative      | Yes    |
|              | aSIT-5 | 46      | DR7           | 0                   | ND         | negative      | No     |
|              | aSIT-6 | 37      | DR15          | 0                   | ND         | negative      | No     |
|              | aSIT-7 | 42      | DR15          | 0                   | ND         | negative      | No     |
| During SIT   | dSIT-1 | 43      | DR15          | 5                   | 4+         | positive      | Yes    |
|              | dSIT-2 | 40      | DR15          | 3                   | 4+         | positive      | Yes    |

**Table E2: Sequence of the Aln g 1 peptide library.**

| Peptide # | Amino acid sequences  | Position |
|-----------|-----------------------|----------|
| 1         | MGVFNIEAETPSVIPAAARLF | 1-20     |
| 2         | ETPSVIPAAARLFKAFILDGD | 9-28     |
| 3         | ARLFKAFILDGDKLLPKVAP  | 17-36    |
| 4         | LDGDKLLPKVAPEAVSSVEN  | 25-44    |
| 5         | KVAPEAVSSVENIEGNGGPG  | 33-52    |
| 6         | SVENIEGNGGPGTIKKITFP  | 41-60    |
| 7         | GGPGTIKKITFPPEGSPFKYV | 49-68    |
| 8         | ITFPEGSPFKYVKERVDEVD  | 57-76    |
| 9         | FKYVKERVDEVDRVNFKYSF  | 65-84    |
| 10        | DEVDRVNFKYSFSVIEGGAV  | 73-92    |
| 11        | KYSFSVIEGGAVGDALEKVC  | 81-100   |
| 12        | GGAVGDALEKVCNEIKIVAA  | 89-108   |
| 13        | EKVCNEIKIVAAPDGGSSILK | 97-116   |
| 14        | IVAAPDGGSSILKISNKFHTK | 105-124  |
| 15        | SILKISNKFHTKGDHEINAE  | 113-132  |
| 16        | FHTKGDHEINAEQIKIEKEK  | 121-140  |
| 17        | INAEQIKIEKEKAVGLLKAV  | 129-148  |
| 18        | EKEKAVGLLKAVESYLLAHS  | 137-156  |
| 19        | AVGLLKAVESYLLAHSDAVN  | 141-160  |

**Table E3: Minimal DRB1\*07:01 and DRB1\*15:01-restricted AIn g 1 T cell epitopes.**

| <b>HLA</b> | <b>AIn g 1 epitope</b>     | <b>Sequence</b> |
|------------|----------------------------|-----------------|
| DRB1*07:01 | AIn g 1 <sub>76-88</sub>   | DRVNFKYSFSVIE   |
| DRB1*07:01 | AIn g 1 <sub>142-154</sub> | VGLLKAVESYLLA   |
| DRB1*15:01 | AIn g 1 <sub>142-154</sub> | VGLLKAVESYLLA   |

**SUPPLEMENTARY FIGURE LEGENDS**

**Figure E1:** Alder pollen counts in the Seattle area in 2010. The count indicated refers to the number of pollen grains per cubic meter according to the National Allergy Bureau.

**Fig E2:** Representative flow cytometry plots showing co-production of IFN- $\gamma$  and IL-4 (left) or IFN- $\gamma$  and IL-10 (right) by Aln g 1-specific CD4<sup>+</sup> T cells from allergic (**A**) or non-allergic individuals (**B**).

**Fig E3: A,** Representative overlay of CD27<sup>+</sup> Aln g 1-specific CD4<sup>+</sup> T cells (*black*) on total CD4<sup>+</sup> T cells (*grey*) showing *ex vivo* staining with a panel of antibodies in allergic subjects. **B,** Representative overlay of CD27<sup>+</sup> Aln g 1-specific CD4<sup>+</sup> T cells (*black*) on total CD4<sup>+</sup> T cells (*grey*) showing cytokine production in allergic subjects.

**Figure E4:** Allergen-SIT is associated with a decrease in the CD27<sup>-</sup>/CD27<sup>+</sup> allergen-specific CD4<sup>+</sup> T cell ratio. **A,** Mean  $\pm$  SEM of the CD27<sup>-</sup>/CD27<sup>+</sup> allergen-specific CD4<sup>+</sup> T cell ratio in allergic individuals (open circles) and allergen-SIT-treated patients (filled circles) at multiple time points. **B,** *Ex vivo* longitudinal frequency of CD27<sup>-</sup> (filled symbols) and CD27<sup>+</sup> (open symbols) Aln g 1-specific CD4<sup>+</sup> T cells from patient #dSIT-1 (circle) and patient #dSIT-2 (square) during allergen-SIT.

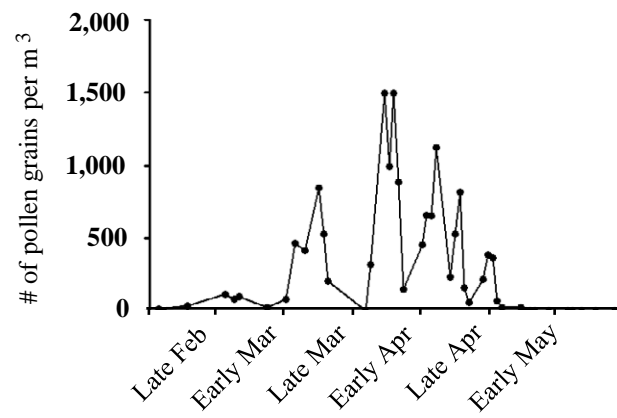

Figure E1

A

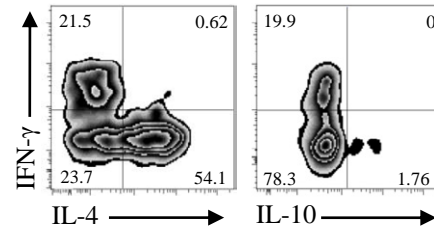

B

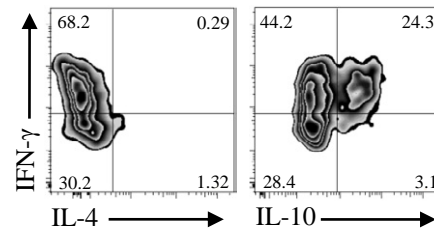

Figure E2

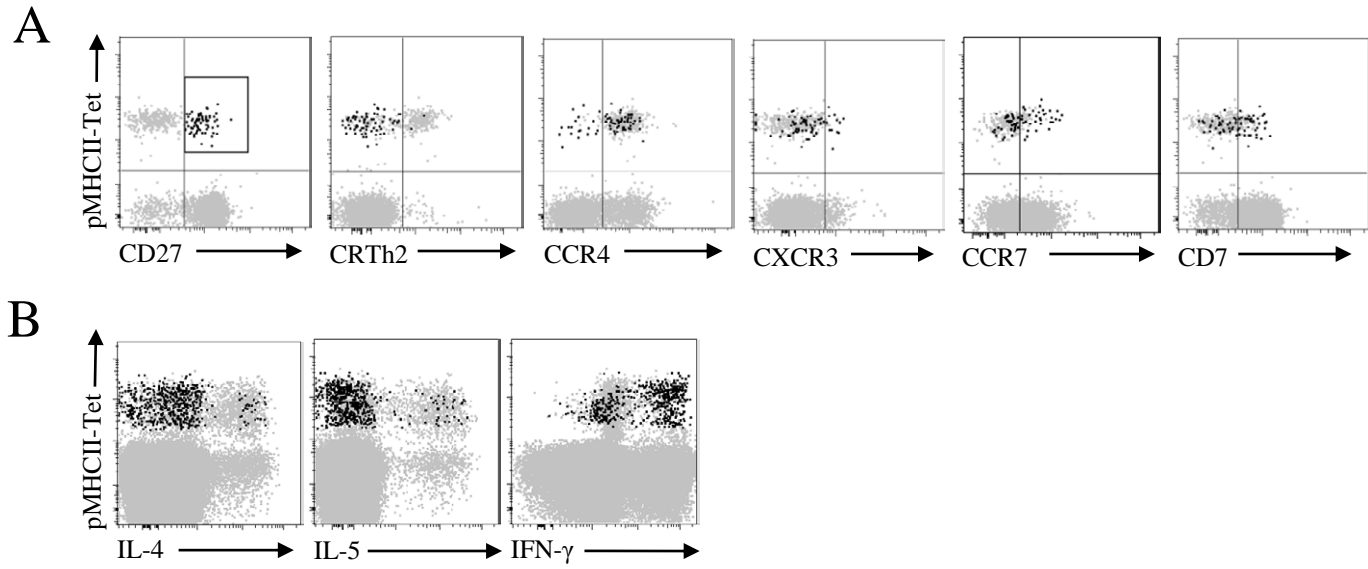

Figure E3



**A**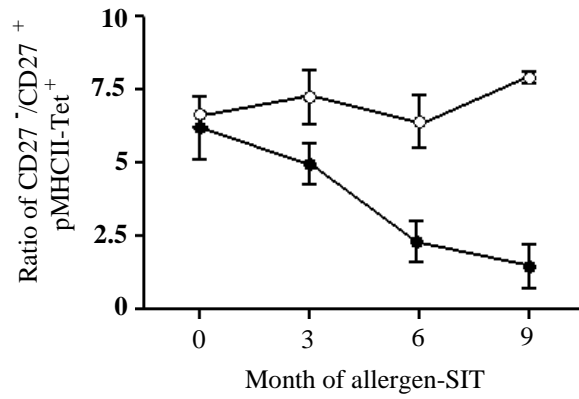**B**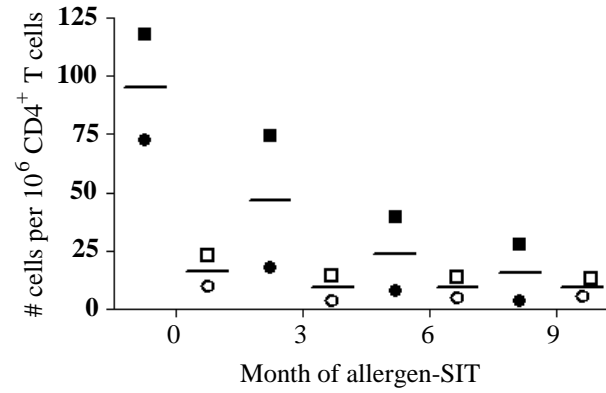

Figure E4
